# **Modulation of heart rate responses to acute stressors throughout the breeding season in a colonial seabird, the king penguin**

Vincent A. Viblanc<sup>1,2,3\*</sup>, Andrew D. Smith<sup>1,2</sup>, Benoit Gineste<sup>1,2</sup>, Marion Kauffmann<sup>1,2</sup>, René Groscolas<sup>1,2</sup>

<sup>1</sup>Université de Strasbourg, Institut Pluridisciplinaire Hubert Curien (IPHC), Département Ecologie, Physiologie et Ethologie (DEPE), 23 rue Becquerel, 67087 Strasbourg, France.

<sup>2</sup>CNRS, UMR7178, 67087, Strasbourg, France

<sup>3</sup>Centre d'Ecologie Fonctionnelle et Evolutive, UMR 5175, CNRS – Université de Montpellier – Université Paul-Valéry Montpellier – EPHE, 1919 route de Mende, 34293, Montpellier, France

\*correspondence: [vincent.viblanc@gmail.com](mailto:vincent.viblanc@gmail.com)

## SUMMARY

‘Fight-or-flight’ stress responses allow animals to cope adaptively with sudden threats by mobilizing energy resources and priming the body to action. Because such responses can be costly and redirect behavior and energy from reproduction to survival, they are likely shaped by specific life-history stages, considering available energy resources and the commitment to reproduction. Here, we consider how heart rate responses to acute stressors are affected by advancing breeding season in a colonial seabird, the king penguin (*Aptenodytes patagonicus*). We subjected 77 birds (44 males, 33 females) at various stages of incubation and chick-rearing to three experimental stressors (a metal sound, a distant approach and a capture) known to vary both in their intensity and associated risk, and monitored their heart rate (HR) responses. Our results show that HR excess in response to acute stressors was progressively attenuated with an advancement in breeding from incubation to chick-rearing. Stress responses did not vary according to nutritional status, nor seasonal timing (whether breeding was initiated early or late in the season), but were markedly lower during chick-rearing than during incubation. This pattern was obvious for all 3 stressors. We discuss how ‘fight-or-flight’ responses may be modulated considering the energy commitment to breeding, nutritional status and reproductive value of the brood in breeding seabirds.

**Keywords:** acute stress, energy cost, fasting, heart rate, penguin, reproductive value, risk-assessment, seabird

## INTRODUCTION

Animals facing environmental disturbances respond by mounting a series of physiological and behavioral modifications known as the stress response (Romero, 2004). Those adaptive changes are intended to redirect energy resources towards increasing fitness, in a so-called ‘emergency life-history state’ (Wingfield et al., 1998; Boonstra et al. 2001). Because stress responses can be costly in terms of energy, health or missed breeding opportunities (*e.g.* McEwen and Wingfield, 2003), they are likely shaped to increase lifetime fitness according to the life-history characteristics of considered organisms, and the risk associated with specific disturbances (Nephew et al., 2003; Boonstra, 2013). For instance, physiological responses to stress may depend on the energy reserves of the animal (Cyr et al., 2008) or mechanistically underlie parental decisions (Lendvai et al., 2007; Bókonyi et al., 2009; Goutte et al., 2011), considering a trade-off between the cost of missing a breeding opportunity *vs.* the expected benefits of surviving to breed in the future (Williams, 1966; Trivers, 1972).

In response to acute disturbances (*e.g.* predation events, sudden storms), an early and short-lived phase of the stress response involves a sympathetic discharge from the nervous system, increasing heart rate, muscle tone, mobilizing energy substrates (*e.g.* neoglucogenesis), and priming the body to action (Wingfield, 2003). This acute ‘fight-or-flight’ response occurs within seconds, and is controlled by central sympathetic command neurons (Jansen et al., 1995). Heart rate (HR) has been shown to increase with increased sympathetic input (Cyr et al., 2009), and can be used to investigate the fine tuning of ‘fight-or-flight’ responses to acute stressors of various nature. For instance, we recently found that the HR response of colonial king penguins (*Aptenodytes patagonicus*) to acute experimental stressors increases with stressor intensity (Viblanco et al., 2012). Similarly, several studies have documented stimuli-dependent modulations of HR responses to stress in other species (Nephew et al., 2003; Tarlow and Blumstein, 2006; Wascher et al., 2011), including other

penguins (Giese, 1998; Holmes et al., 2005; Ellenberg et al., 2006; Ellenberg et al., 2013). To our knowledge however, whether acute stress responses are modulated according to life-history stages in interaction with stressor intensity is unknown. This study thus examined whether HR stress responses in king penguins were modulated by changes in energy and reproductive status throughout the breeding season, depending on stressor type and associated risk.

King penguins provide an interesting model for such questions. Their energy commitment to reproduction is especially high, as parents alternate between long-term fasting shifts on-land to care for their single egg or chick and foraging trips at sea (Groscolas & Robin 2001). Fasting shifts shorten with advancing reproduction (Weimerskirch et al., 1992), as efforts to provision the chick increase. The higher workload experienced while rearing young chicks is likely reflected in parents' higher glucocorticoid levels at that time (Viblanç et al., 2014; Bonier et al., 2009). Chicks only fledge 14-16 months later, and birds that lose a chick can not replace it in the same season (Weimerskirch et al., 1992). Thus, the value of reproduction in a given season is expected to increase with advancing breeding shift (Winkler 1987; Côté, 2000), and acute 'fight-or-flight' responses may be shaped accordingly. For instance, given that stress responses typically redirect behavior and energy from reproduction to survival, HR responses associated with 'flight' initiation could be attenuated during later breeding stages to prevent chick desertion by the parents (Redondo and Carranza, 1989; Albrecht and Klvana, 2004). Alternatively, HR stress responses could increase with increasing investment in relation to chick-defence, as penguin parents are more defensive of their breeding territory during chick-rearing (Côté, 2000) and exhibit heightened glucocorticoid levels at this time (Viblanç et al., 2014). In addition, penguin pairs that breed successfully in a given year can only attempt to breed late in the subsequent season. However, it is extremely rare that they succeed (Weimerskirch et al., 1992; Stier al., 2014). Thus, 'fight-

or-flight' responses are also expected to be modulated over the season given the higher likelihood of success of early birds.

Documenting a modulation of HR responses to acute stressors with advancing breeding season would help further our understanding on whether 'fight-or-flight' responses can be adaptively shaped by specific life-history stages and energy constraints in wild animals.

## RESULTS

### Effects of advancing breeding shift, sex, and stressor type on heart rate excess

Regardless of sex and stressor type, breeding penguins' HR excess to acute stress decreased with advancing breeding shift (Table 1, Fig. 1). Indeed, controlling for colony area and stressor order, the best model selected by AICc did not retain any significant interaction between sex, stressor type and advancing breeding shift (see supplementary material Table S1). Similarly, regardless of sex and stressor type, HR excess in response to acute stress was lower during chick-brooding than during incubation (Table 2, Fig. 2; see supplementary material Table S2). Both the model with advancing breeding shift and the model with breeding stage (incubation vs. chick-rearing) explained a similarly high portion of the variance in HR excess ( $R^2_{\text{mar}} = 0.83$  and  $0.84$ ;  $R^2_{\text{cond}} = 0.88$  and  $0.88$ , respectively). For captures, the distances at which birds detected the approaching experimenter (based on the onset of HR increase) was not affected by advancing breeding shift or breeding stage (incubator vs. brooder), and was not different between the sexes. Indeed, although advancing breeding shift was retained in the final model, the effect was not significant (LMM;  $t = -1.58$ ,  $P = 0.12$ ,  $n = 83$ ,  $N = 60$ , see supplementary material Table S3). For breeding stage, only the intercept was retained in the final model (see supplementary material Table S4).

### **Effects of fasting on heart rate excess**

We found no significant difference between HR excess measured in the same 8 birds stressed both at the beginning and at the end of their incubation shift (Wilcoxon paired signed-rank tests for 10-m approaches and captures;  $V = 11$  and  $29$ ,  $P = 0.69$  and  $0.15$ ,  $N = 7$  and  $8$ , respectively). Similarly, detection distances based on HR increase during captures did not differ significantly between the beginning and the end of the incubation shift ( $V = 21$ ,  $P = 0.74$ ,  $N = 8$ )

### **Effects of breeding timing on heart rate excess**

For incubating males at shift 1, HR excess was not significantly different in the 10 males that bred early vs. the 12 males that bred late in the season (birds with high vs. low breeding success potential). Indeed, breeding timing was not retained as an important factor influencing HR excess in the final model (see supplementary material Table S5). Similarly, there was no significant difference between early and late breeding males in terms of detection distances during captures ( $t = 1.56$ ,  $P = 0.13$ ,  $n = 31$ ,  $N = 22$ ).

## **DISCUSSION**

We show that the ‘fight-or-flight’ cardiovascular stress response to disturbance may be modulated by breeding advancement in seabirds. Penguins’ HR excess to acute stressors decreased with (1) advancing breeding shift, and (2) with the transition from incubation to brooding. The models including those variables explained substantial and similar amounts of variation in HR excess to stressors. Consistently with previous results, HR excess was also affected by the specific nature (intensity/risk) of acute disturbances (Viblanco et al., 2012) (see similar findings in other bird species; Nephew and Romero, 2003; Nephew et al., 2003; Wascher et al., 2011, including penguins; Giese, 1998; Holmes et al., 2005; Ellenberg et al.,

2006; Ellenberg et al., 2013), but the decrease in HR excess with breeding advancement was not stressor dependent.

Stress responses may vary according to the energy demands of various reproductive stages. Chick-rearing is typically a period of high energy commitment in penguins (Gales and Green, 1990; Green et al., 2009), and down-regulating stress responses could allow substantial energy savings during this period. For instance, hormonal stress responses of grey-faced petrels (*Pterodroma macroptera gouldi*) to acute challenges are higher during incubation than chick-rearing (Adams et al., 2005). Down-regulated stress responses (including HR), also occur during energetically demanding periods such as molt (*e.g.* in European starlings *Sturnus vulgaris*; Cyr et al., 2008). Interestingly, magellanic penguins' (*Sphenicus magellanicus*) adrenocortical response to handling stress increased over a shorter breeding timeframe (*i.e.* during incubation), though this was likely related to long-term fasting and decreasing body condition during this period (Hood et al., 1998) (see below). In king penguins, parents increase the frequency of foraging trips during chick-rearing (Weimerskirch et al., 1992) to meet the energy requirements of their growing offspring. As foraging comes at a substantial metabolic cost during chick brooding (Kooyman et al., 1992; Charrassin et al., 1998), down-regulating stress responses during this period could allow substantial energy savings for adults.

In contrast to magellanic penguins (Hood et al., 1998), our data on males stressed both at the beginning and end of an incubation (fasting) shift suggest that no specific changes in HR responses occur in response variation in energy status over a shorter timeframe. However, it is likely that in our study males at the beginning and at the end of their incubation shift were at a similar fasting stage (phase II) and energy status, during which body fat mainly fuels metabolism (Groscolas and Robin, 2001). Indeed, males typically depart the colony to re-feed before entering a more critical stage of fasting (phase III) where protein catabolism occurs

(Groscolas and Robin, 2001), and only a very small fraction (ca. 3%) are found to reach this critical stage in natural conditions (Gauthier-Clerc et al., 2001). It would be interesting to consider if HR stress responses are down-regulated in those extreme cases by maintaining birds in captivity beyond the onset of phase III. Previous studies indeed suggest that stress responses can be down-regulated in situations of energy deficits (Kitaysky et al., 2005) or limited food availability (Kitaysky et al., 1999) in seabirds (but see Hood et al., 1998). However, those studies considered the responsiveness of the HPA axis, and whether the cardiovascular (sympathetic) response to stress may also be under the control centres responsible for monitoring energy balance in fasted birds remains to be determined (see Mager et al., 2006 for some evidence in rats).

In European starlings, comparing breeding and non-breeding conditions, Dickens et al. (2006) reported similar differences in the HR response of males to an acute stressor (intruding bird). Males kept under long-day photoperiod (breeding conditions) showed significantly higher HR responses to the intruder than males under short-day photoperiod (non-breeding conditions). Such changes could be linked to changes in hormone titers (testosterone) mediating territoriality during the breeding season (Dickens et al., 2006). In king penguins, changes in hormones occur between breeding stages (Mauget et al., 1994; Viblanc et al., 2014). For instance, chick-rearing birds exhibit higher baseline glucocorticoid (corticosterone) levels than incubators (Viblanc et al., 2014). However, the relationship between cardiovascular and endocrine responses to stress is complex. Both pathways may be modulated independently in response to acute stressors (e.g. Nephew et al., 2003), but may also be coupled. For instance, in adrenalectomised rats, corticosterone implants of increasing concentration appear to up-regulate HR responses to novelty in open-field tests (van den Buuse et al., 2002). In this study however, adrenalectomy likely affected the adrenomedullary regulation of blood pressure and HR (van den Buuse et al., 2002), making the results hard to



interpret. In king penguins, future studies should consider to which extent circulating hormone levels play a permissive/suppressive effect on HR. On top of corticosterone (Viblanc et al., 2014), testosterone and prolactin are likely modulators of the ‘fight-or-flight’ response in relation to parental care, and their interplay with HR and glucocorticoid responses to stress remain to be thoroughly examined (Angelier and Chastel, 2009; Angelier et al., 2013). In fact, Fig. 1 suggests that the incubation/brooding transition is only a threshold for the sound stressor, the slow degradation of the HR response for 10-m approaches and captures being consistent with changes in hormone titres.

Another possibility explaining changes in stress responses with advancing reproduction may have to do with breeding investment. Parental commitment may be higher and stress responses modulated with advancing breeding, because of the higher probability of offspring to reach sexual maturity (Winkler, 1987). Because king penguins are more defensive of their breeding territory during chick-brooding than incubation (Côté, 2000), acute HR responses to stressors could be expected to increase according to a ‘fight’ strategy during later stages of breeding. Yet, we observed a decrease in HR responses over incubation and brooding. Alternatively, a decrease in acute HR responses would be advantageous if it prevented breeding parents from deserting the brood (‘flight’ strategy) when faced with an acute stressor at an advanced stage of reproduction. In this sense, stress responses could mechanistically underlie parental decisions about offspring investment (Lendvai et al., 2007; Bókony et al., 2009; Goutte et al., 2011). Interestingly, we found no substantial difference between detection distances (based on HR) to approaching experimenters in relation to breeding advancement or seasonal timing, suggesting that king penguins may be similarly sensitive to the presence of an intruder throughout breeding but stress responses nonetheless downregulated with advancing breeding shifts. In addition, if the relative reproductive value of the brood were to explain changes in HR responses to stress, we would expect penguins

breeding at different periods of the reproductive season (associated with strong differences in reproductive success) to exhibit different HR responses. The relative reproductive value of the offspring should be much greater in early breeders (Weimerskirch et al., 1992), and stress responses attenuated compared to late breeders. Of course, this would hold true if some extrinsic (environmental; *e.g.* photoperiod) or intrinsic (physiological) cue was used to link breeding success and seasonal timing. Potential mechanisms for king penguins might for instance include changes in environmental resources (Gauthier-Clerc et al., 2002) and adult body condition (Dobson et al. 2008) early and late in the season. Yet, we did not find a difference in HR stress responses between early and late breeders. Given our relatively low sample size (10 early breeders and 12 late breeders), differences may not have been apparent. More likely is the fact that our sample selection was not fully representative of early and late breeders. Indeed, because of time constraints with fieldwork, we only compared the stress response of early and late males during the first incubation shift. It seems that at this very early stage of breeding, the reproductive value of the egg is perceived as similar (and likely minimum) by early and late breeders. Given that the HR stress response is primarily attenuated during chick-brooding, it would have been more relevant to compare early *vs.* late breeders at this stage.

Finally, a few considerations should be discussed. First, to avoid colony disturbance, we only sampled birds on the periphery. How might this affect the stress profile of penguins? Côté (2000) suggested that peripheral territories were of lesser quality than central ones due to higher predation pressure, which may influence stress profiles. Actually, we found that baseline stress hormone levels were higher in central territories, likely due to higher social density and aggressiveness (Viblanco et al., 2014; Côté, 2000). Thus, it appears clear that a proper comparison of incubating *vs.* brooding birds should be done in the same colony location (as present) or that breeding territory location should be accounted for, to control for

likely differences in stress responses between locations. Second, could the observed attenuation in stress responses be a mere consequence of habituation (Cyr and Romero, 2009)? This appears unlikely: the order in which stressors were applied had no significant effect on HR responses. In addition, the same males that were successively stressed at the beginning and the end of their incubation shift some 9 days apart did not differ significantly in their HR response, suggesting that no habituation occurred.

Taken together, those results suggest that the sympathetic-mediated response to stress is significantly down-regulated over the breeding season in king penguins. This modulation could be an active strategy to save energy during costly periods of the reproductive cycle, or achieved to prevent parent-desertion of the brood (perhaps via changes in circulating hormone titers such as prolactin). Investigating the underlying mechanisms (*e.g.* central or peripheral nervous control; Wingfield and Sapolsky, 2003) of stress attenuation in chick-brooding birds and the inter-relationships between the regulation of HPA and sympathetic responses to acute stress may prove particularly insightful.

## **MATERIALS AND METHODS**

### **Animals**

King penguins were studied on Possession Island, Crozet Archipelago (46°25' S, 51°45' E). Their breeding cycle is discussed at length elsewhere (Stonehouse, 1960, Weimerskirch et al., 1992, Descamps et al., 2002). Briefly, during the breeding season (Nov.–Mar.), parents alternate between periods caring for the egg or chick on land, and periods foraging at sea. Males take charge of the first incubation shift, being relieved by their females 16-18 days later. Alternated incubation continues for a period of roughly 54 days with the egg typically hatching during the 4<sup>th</sup> (female) shift. Parents then continue to alternate 6-12 day shifts ashore, brooding their chick for a period of approximately 31 days until the end of (male)

shift 7. Subsequently, the chick is left unattended in the colony as both parents resume foraging trips feeding it until the end of the summer. Chick-provisioning is low during the winter and fledging only occurs during the subsequent season, *i.e.* some 11 months from hatching to fledging (Weimerskirch et al., 1992).

Over 2009-2011, a total of 77 birds (44 males and 33 females) equipped with HR loggers were stressed at shifts 1 to 7 of the breeding cycle. The data collected on brooding birds in 2011 (see Viblanc et al. 2012) was supplemented with additional data collected on both incubating and brooding birds during the 2009-2010 breeding season. Three different stressors were applied to the birds (see below). Random breeding pairs were marked while courting at a distance of half a meter without capture using a non-permanent animal dye in the form of pressurized spray-paint (Porcimark® Kruuse, Langeskov, Denmark). They were later caught and flipper-banded for identification during field observations, either at the very onset of the first incubation shift (males), or at relief at the end of this shift (females). Marked birds were checked twice daily from a distance to determine egg laying and hatching dates, as well as the onset of each incubation and brooding shift. Birds stressed while incubating ( $N = 35$ ) were either males in shifts 1 ( $N = 22$ ) and 3 ( $N = 11$ ), or females in shifts 2 ( $N = 10$ ). Birds stressed while brooding a non-thermally emancipated chick ( $N = 48$ ) were males in shift 5 ( $N = 14$ ) and 7 ( $N = 9$ ), and females in shift 4 ( $N = 14$ ) and 6 ( $N = 13$ ). Some birds were stressed at several time periods (different reproductive shifts) over the breeding season which explains the above difference in sample size when considering all incubating birds together or incubating shifts separately. Thus, to account for potential effects of habituation or sensitization in HR responses, we included stress order as a covariate in subsequent analyses (see below).

The effect of seasonal timing (early vs. late breeding) on HR responses was only investigated for males during incubation shift 1 using 10-m approaches and captures, due to

logistical constraints. We compared the responses of 10 early (November-December) breeders to those of 12 late (February-March) breeders, sampled in the same colony area. In addition, we also considered whether fasting duration affected HR responses. For this, we considered whether HR excess varied in 8 birds which were repeatedly captured some 9 days ( $8.6 \pm$  (s.e.m) 1.0 days) apart, between the beginning and the end of their incubation shift.

### **Experimental stress protocols**

We used the same experimental stress protocols as previously described by Viblanc et al., (2012). Penguins were either submitted to (i) a distant (10-m) pedestrian approach, (ii) a capture, or (iii) a sound stress. We previously found that HR responses were lowest for sound stresses, intermediate for 10-m approaches and highest for captures (Viblanc et al., 2012). For 10-m approach and capture stresses, penguins were approached within their visual field by a walking observer starting from a distance of at least 30 m. The starting distance of  $\geq 30$  m was chosen as we found it to be greater than the detection distance of penguins to human observers in preliminary trials. During (i) 10-m approaches, the observer stopped 10 m away from the bird whereupon he remained motionless for 1 min while dictating observations on the behaviour of the subject. He then retreated at a constant speed to his initial position, keeping the focal bird in sight and resuming behavioural observations. During (ii) captures, the observer walked directly to the focal bird and gently immobilized it for 3 minutes, covering its head with a hood to keep it calm. The hood was rapidly removed after the 3-min immobilization and the observer retreated at a constant speed to his original position, to continue observations for several minutes until the bird was resting again. During (iii) sound stresses, resting birds were discreetly approached from behind, until the observer was 15 m behind the focal individual. The experimenter then struck two hollow metal bars three times with a 1-sec interval between strokes. Care was taken to keep out of sight of the animal (both

during the approach, during the stress itself and when retreating), and the stress was only performed if the observer was certain that the focal individual was unaware of his presence.

After fitting HR-loggers on breeding individuals (see below), we applied the three stressors randomly. Prior to the stress, a focal bird was observed to ensure it was resting for at least 3 minutes before the stressor was applied, and not engaged in any form of activity (*e.g.* preening, territory defence) known to increase HR. All birds in this study were located in periphery (*i.e.* 2-3 bird ranks from the edge) of the colony to avoid unnecessary disturbance of social congeners. Because we previously found that colony location (disturbed *vs.* non-disturbed areas) had an effect on HR responses to acute stressors (Viblanç et al., 2012), we recorded the colony area in which the bird was to control for its effect on HR in further analyses. During the stress, bird behaviour (resting, vigilance, aggressive behavior) and the distances between the experimenter and the focal individual, were continuously dictated in real time to a digital audio recorder (VN5500® Olympus Europa, Hamburg, Germany). Behavioural observations continued several minutes after the end of the stress, until the bird reached a resting state again. Those observations allowed evaluating the behavioural response of the subject to the stressor, and accounting for potential effects of post-stress behaviours on HR (*e.g.* aggressive behaviour towards neighbours). The time separating two successive stresses applied to a given individual was at least 6 hours. When two birds were located in the same area of the colony, stresses applied to each of the birds were separated by at least 4 hours.

### **Heart rate loggers**

Acute HR responses to stressors were measured using external HR-loggers (Polar® model RS800 and RS800CX, Polar Electro Oy, Kempele, Finland) specially adapted for suitable use on king penguins (see Groscolas et al., 2010; Viblanç et al., 2012; Viblanç et al., 2014).

Loggers were made of two units: (i) a sensor-transmitter (30-40 g) composed of a HR processor which filtered out electrical background noise received from the electrodes (*i.e.* muscle activity) from heart activity; and (ii) a receiver/logger (30 g). Electrodes were composed of two stainless-steel wires attached to gold-plated safety pins, which were inserted and secured in the subcutaneous fat layer (at a depth of approximately 5 mm, and over a length of 1 cm), 25 cm apart on the back of the bird. Iodine (Betadine®) and an alcohol based antiseptic solutions were used to disinfect the electrodes before each use. The transmitter was attached in the middle of the back with Tesa® tape wrapped around several layers of feathers and the receiver was either secured to the flipper band or whenever possible fixed on a metal pole within a 5-m distance of the animal. Such a set up prevented the equipment from hindering the movements of the birds. This was confirmed by the fact that we never observed birds trying to remove electrodes or HR loggers, nor did we observe any adverse effects of the equipment on the birds' health or behaviour (> 50 hrs of observations; Viera et al., 2011, Viblanc et al., 2011). The whole apparatus weighed less than 1% of the total body mass of the smallest bird. Further details on this method and how it accurately estimates HR of king penguins are provided by Groscolas et al. (2010).

Penguins at the different incubating and brooding shifts were equipped (sometimes repeatedly) with HR-loggers on their breeding territory within the colony, and then left to recover for at least 12 hrs (a night) before applying stressors. At capture, the head of birds was hooded to keep them calm, handling lasting between 5 and 10 min. Polar® monitors record HR by measuring the time lapse (in ms) between signals received from the transmitter. The laps is divided into 60,000 and the calculation is done every second. Monitors were set to store the data every 5 or 2 seconds depending on logger model. The sampling rate was chosen to provide a memory-autonomy of up to 99 hrs, and was appropriate considering the shortest durations of HR responses to applied stressors (see Viblanc et al. 2012). All loggers were

removed from the birds within a day following the application of the last stressor and a few days before their departure at sea, based on the estimated length of breeding shifts in king penguins (Weimerskirch et al. 1992).

### **Heart rate analyses**

HR data were plotted and analysed using Polar Pro Trainer® v.5.00.105 software. Audio recordings of each test were time-matched (by previous synchronization of the observer's digital watch with that of the HR-logger) with the corresponding HR data. We defined  $HR_i$  (initial resting rate) as the HR at the moment preceding a rapid constant increase in HR. The duration of the HR response was characterized as the total time that HR increased above  $HR_i$  following the application of a stressor. Excess HR above resting values was then calculated as  $[(\text{mean HR during stress} - HR_i) \times \text{duration of HR elevation (in min)}]$ . This corresponded to the number of heart beats which were produced in excess of  $HR_i$  due to stress and presented an integrative measure of the HR stress response (the area under the curve). Behavioural observations were time-matched against HR profiles and occasionally used to identify and control for changes in HR independent of the stressors applied, *viz.* when HR increased due to aggression between neighbours when re-establishing territorial boundaries following colony disorganisation during captures. Additionally, for capture stresses for which the birds were approached continuously to contact, we used HR data and information from audio files to determine at which distance the bird was from the experimenter when its HR started to increase (in other words, the distance at which the physiological response started or detection distance).



## Statistics

Statistical analyses were performed using R v.3.1.2. First, we used Linear Mixed Models (LMMs) to investigate the effects of advancing breeding shift, penguin sex, stressor type (intensity) and all two-way interactions between those variables on HR excess (dependent variable). Breeding shift number, penguin sex, stressor type, and interactions were specified as independent variables in the initial model. We then ran a model selection using the ‘dredge’ function from the ‘MuMIn’ package in R, and retained the model with the lowest Akaike’s Information Criterion corrected for small sample size (AICc) and the highest AIC weight as the best fit (Burnham and Anderson, 2002). Competing models were fitted by Maximum Likelihood during model selection. The final model was fitted using Restricted Maximum Likelihood. Colony area and the order in which the stressor was applied were included as a covariates in all models to account for colony site-specific differences in stress responses (Viblanc et al., 2012), and potential effects of habituation or sensitization on HR.

Second, we ran the same procedure as above, but specifying breeding status (incubation *vs.* chick-brooding) rather than advancing breeding shift as an independent variable to consider its effects on heart rate excess. Specifically for captures, we also used similar models to consider the effects of sex, advancing breeding shift (or breeding status), and their interaction, on detection distances while accounting for colony area and stressor order.

Third, we investigated the effects of breeding timing on HR excess in males during their first incubation shift by specifying seasonal timing (early *vs.* late), stressor type (capture *vs.* 10-m approach) and the interaction between those variables as independent variables in a LMM. We accounted for stressor order as a covariate in the model but not for colony area as in this case, early and late males were sampled in the same area of the colony.

Finally, to evaluate potential effects of fasting duration on HR responses we used Wilcoxon paired signed-rank tests to compare the same 8 birds which were stressed both at the beginning and the end of their incubation shift (we were only able to acquire HR responses for 10-m approaches on 7 birds due to HR-logger malfunction).

Bird identity was specified as a random term in all LMMs to account for repeated measurements on the same individual (individuals used in different stress protocols). Model residuals were inspected for normality and where necessary, data were transformed using Box-Cox power transformations prior to analyses. Results are given as means  $\pm$  s.e.m. Significant effects are reported for  $p < 0.05$ . For LMMs, we report the marginal and conditional r-squares of the model (Nakagawa & Schielzeth 2013). The marginal r-square ( $R^2_{\text{mar}}$ ) represents the proportion of variance in HR excess explained by fixed effects, whereas the conditional r-square ( $R^2_{\text{con}}$ ) represents the proportion of variance explained by fixed plus random effects. The number of observations used ( $n$ ) and the number of birds concerned ( $N$ ) for each model are also reported.

### **Ethical note**

Bird handling, either when fitting HR-loggers or during capture-immobilization protocols, was always performed within the colony on the birds' breeding territory and never resulted in egg or chick abandonment. Flipper bands were removed at the end of the study because of their known detrimental long-term effects on survival and reproduction (Saraux et al., 2011). Capture and tagging procedures were approved by the Ethical Committee of the Institut Polaire Français – Paul-Emile Victor. Authorization to enter the colony and manipulate birds was obtained from Terres Australes et Antarctiques Françaises. The experiments comply with the current laws of France.

## ACKNOWLEDGMENTS

J.P. Robin provided invaluable help during fieldwork and critical insight on the manuscript. We are indebted to C. Saraux for statistical advice on data analysis and constructive discussion on the manuscript. We are especially grateful to S. Oswald and an anonymous reviewer for helpful suggestions and critical comments on the paper. This research was supported by the French Polar Institute (IPEV) and by the French National Centre for Scientific Research (CNRS-INEE). Research project N° 119 was carried out at Alfred Faure Station, and logistic support was provided by the Terres Australes et Antarctiques Françaises. VAV was supported by a postdoctoral fellowship from the AXA Research Fund during the time of writing.

## REFERENCES

- Adams, N. J., Cockrem, J. F., Taylor, G. A., Candy, E. J. and Bridges, J. (2005). Corticosterone responses of grey-faced petrels (*Pterodroma macroptera gouldi*) are higher during incubation than during other breeding stages. *Physiol. Biochem. Zool.* **78**, 69-77.
- Albrecht, T. and Klvana, P. (2004). Nest crypsis, reproductive value of a clutch and escape decisions in incubating female mallards *Anas platyrhynchos*. *Ethology* **110**, 603-613.
- Angelier, F. and Chastel, O. (2009). Stress, prolactin and parental investment in birds: a review. *Gen. Comp. Endocrinol.* **163**, 142-148.
- Angelier, F., Wingfield, J. C., Trouvé, C., de Grissac, S. and Chastel, O. (2013). Modulation of the prolactin and the corticosterone stress responses: do they tell the same story in a long-lived bird, the Cape petrel? *Gen. Comp. Endocrinol.* **182**, 7-15.
- Bókony, V., Lendvai, Á. Z., Liker, A., Angelier, F., Wingfield, J. C. and Chastel, O. (2009). Stress response and the value of reproduction: Are birds prudent parents? *The Am. Nat.* **173**, 589-598.
- Bonier, F., Moore, I. T., Martin, P. R., and Robertson, R. J. (2009). The relationship between fitness and baseline glucocorticoids in a passerine bird. *Gen. Comp. Endocrinol.* **163**, 208-213.

- Boonstra, R.** (2013). Reality as the leading cause of stress: rethinking the impact of chronic stress in nature. *Funct. Ecol.* **27**, 11-23.
- Boonstra, R., McColl, C. J. and Karels, T. J.** (2001). Reproduction at all costs: the adaptive stress response of male arctic ground squirrels. *Ecology* **82**, 1930-1946.
- Burnham, K. P., and Anderson, D. R.** (2002). Model selection and multimodel inference: a practical information-theoretic approach. Springer, New York.
- Charrassin, J.-B., Bost, C. A., Pütz, K., Lage, J., Dahier, T., Zorn, T. and Le Maho, Y.** (1998). Foraging strategies of incubating and brooding king penguins *Aptenodytes patagonicus*. *Oecologia* **114**, 194-201.
- Côté, S. D.** (2000). Aggressiveness in king penguins in relation to reproductive status and territory location. *Anim. Behav.* **59**, 813-821.
- Cyr, N. E., and Romero, L. M.** (2009). Identifying hormonal habituation in field studies of stress. *Gen. Comp. Endocrinol.* **161**: 295-303.
- Cyr, N. E., Dickens, M. J., and Romero, L. M.** (2009). Heart rate and heart rate variability responses to acute and chronic stress in a wild-caught passerine bird. *Physiol. Biochem. Zool.* **82**, 332-344.
- Cyr, N. E., Wikelski, M. and Romero, L. M.** (2008). Increased energy expenditure but decreased stress responsiveness during molt. *Physiol. Biochem. Zool.* **81**, 452-462.
- Descamps, S., Gauthier-Clerc, M., Gendner, J.-P., Le Maho, Y.** (2002). The annual breeding cycle of unbanded king penguins *Aptenodytes patagonicus* on Possession Island (Crozet). *Avian Sci.* **2**, 1-12.
- Dickens, M. J., Nephew, B. C. and Romero, L. M.** (2006). Captive European starlings (*Sturnus vulgaris*) in breeding condition show an increased cardiovascular stress response to intruders. *Physiol. Biochem. Zool.* **82**, 332-344.
- Dobson, F. S., Nolan, P. M., Nicolaus, M., Bajzak, C., Coquel, A.-S. and Jouventin, P.** (2008). Comparision of color and body condition between early and late breeding king penguin. *Ethology* **114**, 925-933.
- Ellenberg, U., Mattern, T., and Seddon, P. J.** (2013). Heart rate responses provide an objective evaluation of human disturbance stimuli in breeding birds. *Conserv. Physiol.* **1**, cot13.

- Ellenberg, U., Mattern, T., Seddon, P. J., and Jorquera, G. L.** (2006). Physiological and reproductive consequences of human disturbance in Humboldt penguins: the need for species-specific visitor management. *Biol. Conserv.* **133**, 95-106.
- Gales, R. and Green, B.** (1990). The annual energetics cycle of little penguins (*Eudyptula minor*). *Ecology*, **71**, 2297-2312.
- Gauthier-Clerc, M., Le Maho, Y., Clerquin, Y., Bost, C.-A. and Handrich, Y.** 2002. Seabird reproduction in an unpredictable environment: how king penguins provide their young chicks with food. *Mar. Ecol. Prog. Ser.* **237**, 291-300.
- Gauthier-Clerc, M., Le Maho, Y., Gendner, J.-P., Durant, J. and Handrich, Y.** (2001). State dependent decisions in long-term fasting king penguins, *Aptenodytes patagonicus*, during courtship and incubation. *Anim. Behav.* **62**, 661-669.
- Giese, M.** (1998). Guidelines for people approaching breeding groups of Adélie penguins (*Pygoscelis adeliae*). *Polar Rec.* **34**, 287-292.
- Goutte, A., Antoine, E. and Chastel, O.** (2011). Experimentally delayed hatching triggers a magnified stress response in a long-lived bird. *Horm. Behav.* **59**, 167-173.
- Green, J. A., Boyd, I. L., Woakes, J., Warren, N. L. and Butler, P. J.** (2009). Evaluating the prudence of parents: daily energy expenditure throughout the annual cycle of a free-ranging bird, the macaroni penguin *Eudyptes chrysolophus*. *J. Avian Biol.* **40**, 529-538.
- Groscolas, R. and Robin, J.P.** (2001). Long-term fasting and re-feeding in penguins. *Comp. Biochem. Physiol. A: Mol. Integr. Physiol.* **128**, 645–655.
- Groscolas, R., Viera, V. M., Guerin, N., Handrich, Y. and Côté, S. D.** (2010). Heart rate as a predictor of energy expenditure in undisturbed fasting and incubating penguins. *J. Exp. Biol.* **213**, 153-160.
- Holmes, N. D., Giese, M., and Kriwoken, L. K.** (2005). Testing the minimum approach distance guidelines for incubating Royal penguins *Eudyptes schlegeli*. *Biol. Conserv.* **126**, 339-350.
- Hood, L. C., Boersma, P. D., and Wingfield, J. C.** (1998). The adrenocortical response to stress in incubating Magellanic penguins (*Spheniscus magellanicus*), *Auk* **115**, 76-84.

- Jansen, A. S. P, van Nguyen, X., Mettenleiter, T. C. and Loewy, A. D.** (1995). Central command neurons of the sympathetic nervous system: basis of the fight-or-flight response. *Science* **270**, 644-646.
- Kitaysky, A. S., Romano, M. D., Piatt, J. F., Wingfield, J. C. and Kikuchi, M.** (2005). The adrenocortical response of tufted puffin chicks to nutritional deficits. *Horm. Behav.* **47**, 606-619.
- Kitaysky, A. S., Wingfield, J. C. and Piatt, J. F.** (1999). Dynamics of food availability, body condition and physiological stress response in breeding Black-legged Kittiwakes. *Funct. Ecol.* **13**, 577-584.
- Kooyman, G. L., Cherel, Y., Le Maho, Y., Croxall, J. P., Thorson, P. H., Ridoux, V. and Kooyman, C. A.** (1992). Diving behavior and energetics during foraging cycle in king penguins. *Ecol. Monograph* **62**, 143-163.
- Lendvai, Á. Z., Giraudeau, M. and Chastel, O.** (2007). Reproduction and modulation of the stress response: an experimental test in the house sparrow. *Proc. Roy. Soc. B Biol. Sci.* **274**, 391-397.
- Mager, D. E., Wan, R., Brown, M., Cheng, A., Wareski, P., Abernethy, D. R. and Mattson, M. P.** (2006). Caloric restriction and intermittent fasting alter spectral measures of heart rate and blood pressure variability in rats. *FASEB J.* **20**, 631-637.
- Mauget, R., Jouventin, P., Lacroix, A. and Ishii, S.** (1994). Plasma LH and steroid hormones in king penguin (*Aptenodytes patagonicus*) during the onset of the breeding cycle. *Gen. Comp. Endocr.* **93**, 36-43.
- McEwen, B. S. and Wingfield, J. C.** (2003). The concept of allostasis in biology and biomedicine. *Horm. Behav.* **43**, 2-15.
- Nakagawa, S. and Schielzeth, H.** (2013). A general and simple method for obtaining  $R^2$  from generalized linear mixed-effects models. *Meth. Ecol. Evol.* **4**, 133-142.
- Nephew, B. C and Romero, L. M.** (2003). Behavioral, physiological, and endocrine responses of starlings to acute increases in density. *Horm. Behav.* **44**, 222-232.
- Nephew, B. C., Kahn, S. A. and Romero, L. M.** (2003). Heart rate and behavior are regulated independently of corticosterone following diverse acute stressors. *Gen. Comp. Endocrinol.* **133**, 173-180.

- Redondo, T. and Carranza, J.** (1989). Offspring reproductive value and nest defense in the magpie (*Pica pica*). *Behav. Ecol. Sociobiol.* **25**, 369-378.
- Romero, L. M.** (2004) Physiological stress in ecology: lessons from biomedical research. *Trends Ecol. Evol.* **19**, 249-255.
- Saraux, C., Le Bohec, C., Durant, J. M., Viblanc, V. A., Gauthier-Clerc, M., Beaune, D., Park, Y.-H., Yoccoz, N. G., Stenseth, N. C. and Le Maho, Y.** (2011). Reliability of flipper-banded penguins as indicators of climate change. *Nature* **469**, 203-206.
- Stier, A., Viblanc, V. A., Massemin-Challet, S., Handrich, Y., Zahn, S., Rojas, E. R., Saraux, C., Le Vaillant, M., Prud'homme, O., Grosbellet, E., Robin, J.-P., Bize, P. and Criscuolo, F.** (2014). Starting with a handicap: phenotypic differences between early- and late-born king penguin chicks and their survival correlates. *Funct. Ecol.* **28**, 601-611.
- Stonehouse, B.** (1960) The king penguin *Aptenodytes patagonicus* of South Georgia. In: Scientific Reports Falkland Islands Dependencies Survey 1-81.
- Tarlow, E. M. and Blumstein, D. T.** (2007) Evaluating methods to quantify anthropogenic stressors on wild animals. *Appl. Anim. Behav. Sci.* **102**, 429-451.
- Trivers, R. L.** (1972) Parental investment and sexual selection. In: Sexual Selection and the Descent of Man, 1871-1971 (Campbell B, ed). London: Heinemann.
- van den Buuse, M., van Acker, S. A. B. E., Fluttert, M. F. J. and de Kloet, E. R.** (2002). Involvement of corticosterone in cardiovascular responses to an open-field novelty stressor in freely moving rats. *Physiol. Behav.* **75**, 207-215.
- Viblanc, V. A., Gineste, B., Stier, A., Robin, J.-P. and Groscolas, R.** (2014). Stress hormones in relation to breeding status and territory location in colonial king penguin: a role for social density? *Oecologia* **175**, 763-772.
- Viblanc, V. A., Mathien, A., Saraux, C., Viera, V. M. and Groscolas, R.** (2011). It costs to be clean and fit: energetics of comfort behavior in breeding-fasting penguins. *PloS one* **6**(7), e21110.
- Viblanc, V. A., Saraux, C., Malosse, N. and Groscolas, R.** (2014). Energetic adjustments in freely breeding-fasting king penguins: does colony density matter? *Funct. Ecol.* **28**, 621-631.

- Viblanc, V. A., Smith, A. D., Gineste, B. and Groscolas, R.** (2012). Coping with continuous human disturbance in the wild: insights from penguin heart rate response to various stressors. *BMC Ecol.* **12**, 10.
- Viera, V. M., Viblanc, V. A., Filippi-Codaccioni, O., Côté, S. D. and Groscolas, R.** (2011). Active territory defence at a low energy cost in a colonial seabird. *Anim. Behav.* **82**, 69-76.
- Wascher, C. A. F. , Scheiber, I. B. R. , Braun, A. and Kotrschal, K.** (2011). Heart rate responses to induced challenge situations in greylag geese (*Anser anser*). *J. Comp. Psychol.* **125**, 116-119.
- Weimerskirch, H., Stahl, J. and Jouventin, P.** (1992). The breeding biology and population dynamics of king penguins *Aptenodytes patagonica* on the Crozet Islands. *Ibis* **134**, 107-117.
- Williams, G. C.** (1966). Natural selection, the cost of reproduction and a refinement of Lack's principle. *Am. Nat.* **100**, 687-690.
- Wingfield, J. C.** (2003). Control of behavioural strategies for capricious environments. *Anim. Behav.* **66**, 806-816.
- Wingfield, J. C. and Sapolsky, R. M.** (2003). Reproduction and resistance to stress: when and how. *J. Neuroendocrinol.* **15**, 711-724.
- Wingfield, J. C., Maney, D. L., Breuner, C. W., Jacobs, J. D., Lynn, S., Ramenofsky, M. and Richardson, R. D.** (1998). Ecological bases of hormone – behavior interactions: the “Emergency Life History Stage”. *Am. Zool.* **38**, 191-206.
- Winkler, D. W.** (1987). A general model for parental care. *Am. Nat* **130**, 526-543.



## FIGURES

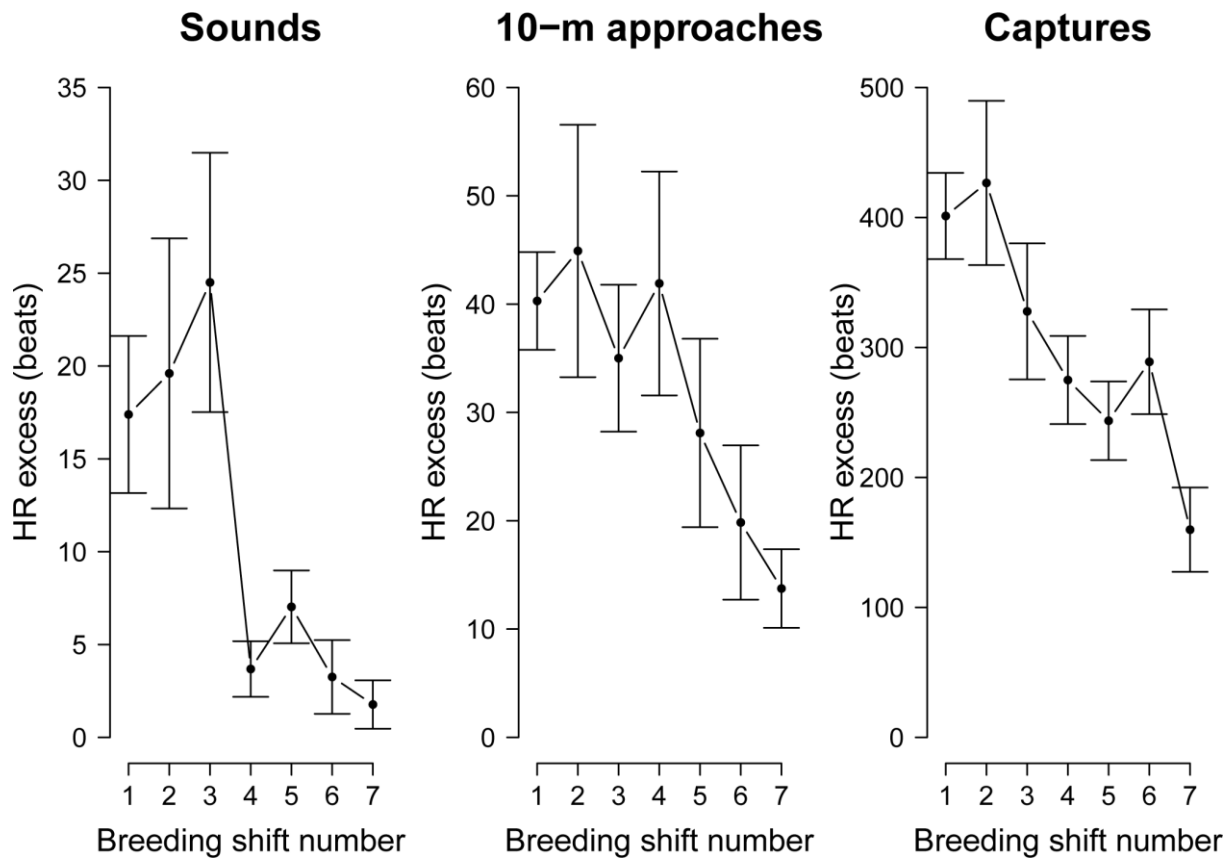

**Fig 1. Changes in heart rate (HR) excess caused by three different acute stressors with advancing breeding shift in breeding king penguin.**

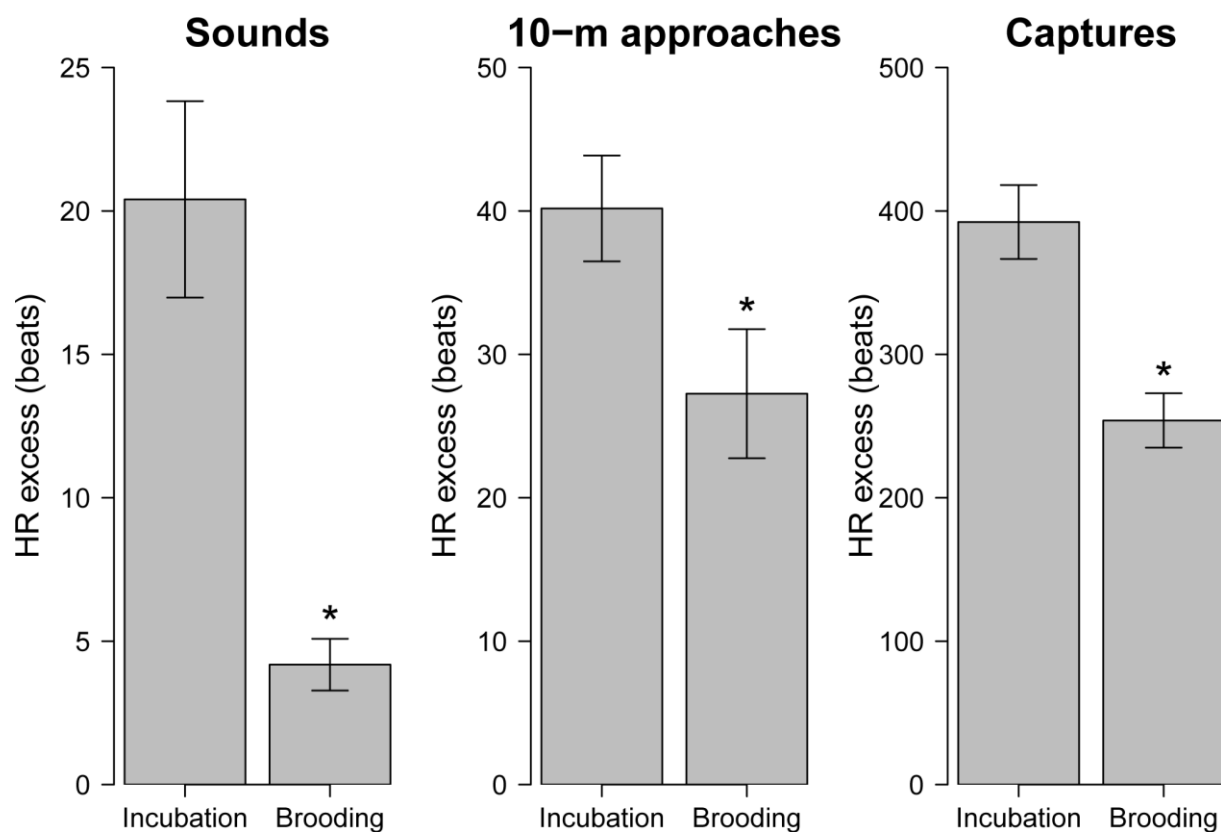

**Fig 2. Heart rate (HR) excess caused by three different acute stressors in breeding king penguins either incubating an egg or brooding a young chick. \*P < 0.05; n.s., non-significant.**

## TABLES

**Table 1. Mixed model estimates for the effects of stressor type and advancing breeding shift on breeding king penguin heart rate excess caused by acute stress.** The model presented is the best model retained by AICc (see supplementary material Table S1). The starting model included all 2-way interactions between independent variables. Colony area and stressor order were entered as a covariates in the model to control for area related differences in stress responses (see Viblanc et al. 2012) and potential habituation/sensitization effects. Bird identity was specified as a random factor. Factors are reported in reference to the level [10-m approach] for stressor type, and [area A] for colony area. The marginal and conditional  $R^2$  for the model were 0.83 and 0.88, respectively. Values are significant\* for  $P < 0.05$ . The model was run for a total of  $n = 246$  observations on  $N = 77$  breeding birds (44 males, 33 females).

| Term                       | Estimate $\pm$ SE | df     | t     | Prob> t |
|----------------------------|-------------------|--------|-------|---------|
| <b>Intercept</b>           | 5.85 $\pm$ 0.38   | 201.35 | 15.46 | <.0001* |
| <b>Breeding shift #</b>    | -0.29 $\pm$ 0.08  | 147.13 | -3.82 | 0.0002* |
| <b>Stressor[capture]</b>   | 6.45 $\pm$ 0.25   | 181.73 | 25.61 | <.0001* |
| <b>Stressor[sound]</b>     | -2.32 $\pm$ 0.25  | 191.09 | -9.29 | <.0001* |
| <b>Stressor order</b>      | 0.04 $\pm$ 0.07   | 220.38 | 0.56  | 0.58    |
| <b>Colony area[area B]</b> | -1.18 $\pm$ 0.47  | 104.97 | -2.51 | 0.01*   |

**Table 2. Mixed model estimates for the effects of stressor type and breeding stage on breeding king penguin heart rate heart rate excess caused by acute stress.** The model presented is the best model retained by AICc (see supplementary material Table S2). The starting model included all 2-way interactions between independent variables. Colony area and stressor order were entered as a covariates in the model to control for area related differences in stress responses (see Viblanc et al. 2012) and potential habituation/sensitization effects. Bird identity was specified as a random factor. Factors are reported in reference to the level [chick-brooding] for breeding stage, [10-m approach] for stressor type, and [area A] for colony area. The marginal and conditional  $R^2$  for the model were 0.84 and 0.88, respectively. Values are significant\* for  $P < 0.05$ . The model was run for a total of  $n = 246$  observations on  $N = 77$  breeding birds (44 males, 33 females).

| Term                              | Estimate $\pm$ SE | DFDen  | t Ratio | Prob> t |
|-----------------------------------|-------------------|--------|---------|---------|
| <b>Intercept</b>                  | 5.42 $\pm$ 0.31   | 221.14 | 17.51   | <.0001* |
| <b>Breeding stage[incubation]</b> | -1.12 $\pm$ 0.28  | 146.11 | -4.03   | <.0001* |
| <b>Stressor[capture]</b>          | 6.33 $\pm$ 0.25   | 180.45 | 25.57   | <.0001* |
| <b>Stressor[sound]</b>            | -2.33 $\pm$ 0.25  | 190.64 | -9.47   | <.0001* |
| <b>Stressor order</b>             | 0.04 $\pm$ 0.07   | 218.61 | 0.52    | 0.61    |
| <b>Colony area[area A]</b>        | -1.51 $\pm$ 0.42  | 97.18  | -3.60   | 0.0005* |
